# Supplementary material
Source: PubMed Central journal article supplement (PMC4909579)

# eMERGE: Severe Early Childhood Obesity

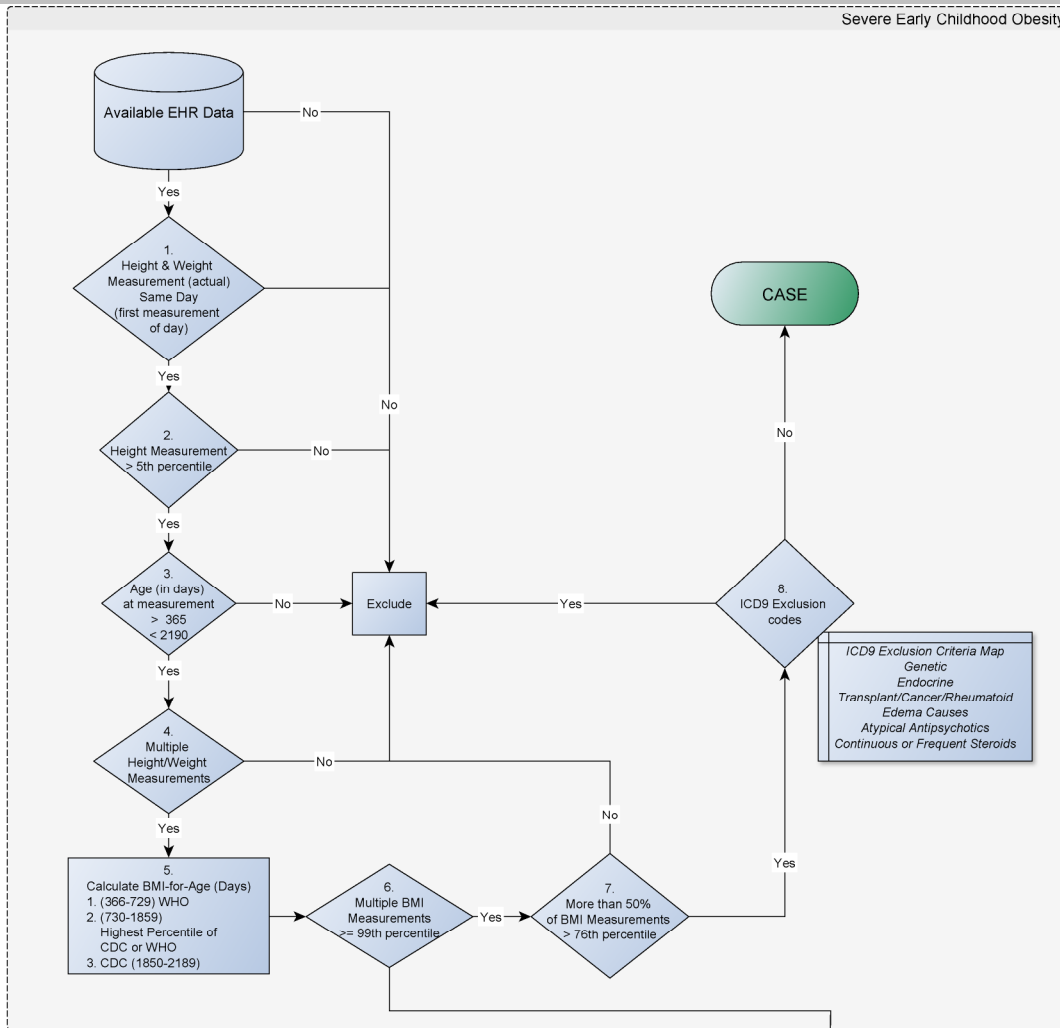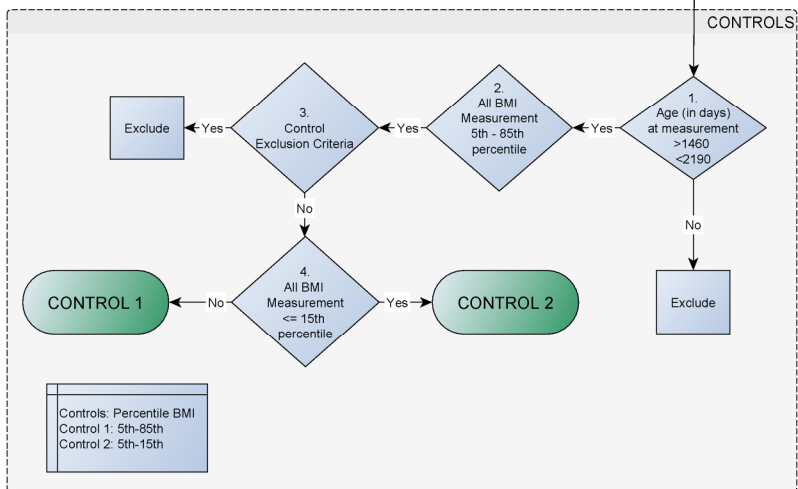

Supplement: NIHMS779700-supplement-Supplement_1.pdf [file NIHMS779700-supplement-Supplement_1.pdf]
